# Supplementary material for: N-terminal cleavage of cyclophilin D boosts its ability to bind F-ATP synthase
Source: PubMed Central journal article supplement — Commun Biol. 2024 Nov 11;7:1486. doi: 10.1038/s42003-024-07172-8 (PMC11555324; doi:10.1038/s42003-024-07172-8), 2024-11-11
Supplement: 42003_2024_7172_MOESM2_ESM.pdf [file 42003_2024_7172_MOESM2_ESM.pdf]

## **Description Of Additional Supplementary File**

**File name:** Supplementary Data 1.

**Description:** Data for a temperature titration from 283K to 316K in 3K steps.

**File name:** Supplementary Data 2.

**Description:** The source data behind all the graphs in the paper. Each experiment was grouped in a single Excel tab.
